# Supplementary material for: Unlocking veiled oxygen redox in Na-based earth-abundant binary layered oxide
Source: Royal Society of Chemistry journal article supplement (doi:10.1039/d1ta02789a), 2021-01-01
Supplement: d1ta02789a1.pdf [file d1ta02789a1.pdf]

**Electronic Supporting Information (ESI)**

**Unlocking veiled oxygen redox in Na-based earth-abundant binary layered oxide**

Myungkyu Kim<sup>a‡</sup>, Hyungjun Kim<sup>a‡</sup>, Maenghyo Cho<sup>a\*</sup> and Duho Kim<sup>b\*</sup>

---

<sup>a</sup> Department of Mechanical and Aerospace Engineering, Seoul National University, 1 Gwanak-ro, Gwanak-gu, Seoul 08826, Republic of Korea.

E-mail: mhcho@snu.ac.kr

<sup>b</sup> Mechanical Engineering, Kyung Hee University, 1732, Deogyeong-daero, Giheung-gu, Yongin-si, Gyeonggi-do, 17104, Republic of Korea

E-mail: duhokim@khu.ac.kr

<sup>‡</sup> These authors contributed equally

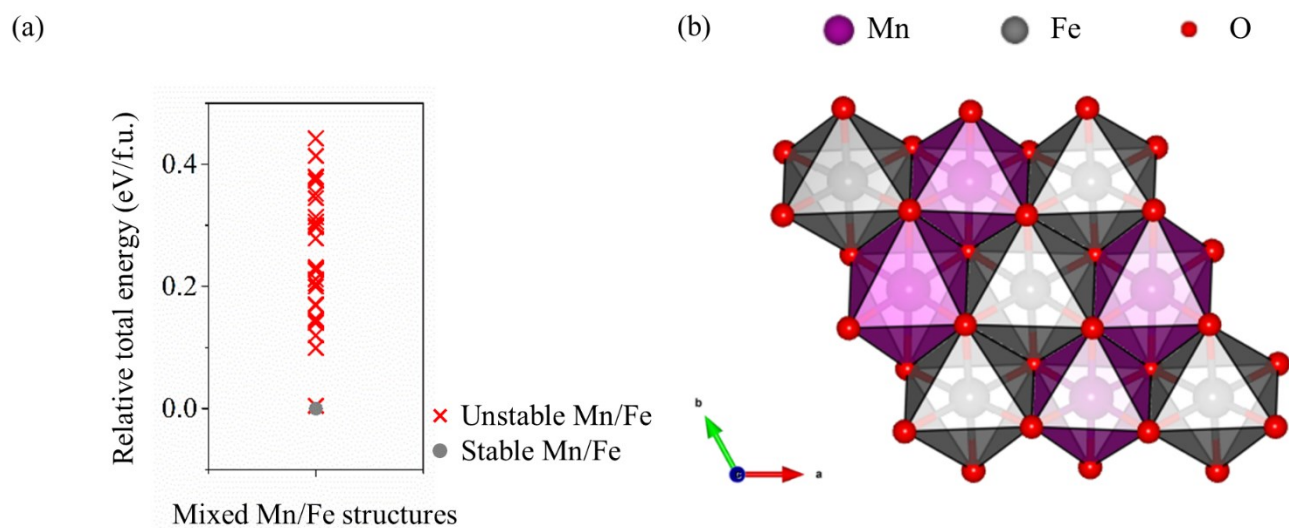

**Figure S1.** (a) Relative total energies of 30 Mn/Fe mixed structures having the lowest electrostatic energy among all possible Na/vacancy ( $x = 0.25$ ) and Mn/Fe ( $y = 0.5$ ) mixed cases in  $\text{Na}_{1-x}[\text{Mn}_{1-y}\text{Fe}_y]\text{O}_2$  (containing 8 f.u.). The lowest total energy (gray filled circle) indicates the atomic configuration at the ground state among the mixed structures and (b) the corresponding  $[\text{Mn}_{0.5}\text{Fe}_{0.5}]\text{O}_2$  slab in  $\text{Na}_{0.75}[\text{Mn}_{0.5}\text{Fe}_{0.5}]\text{O}_2$ .

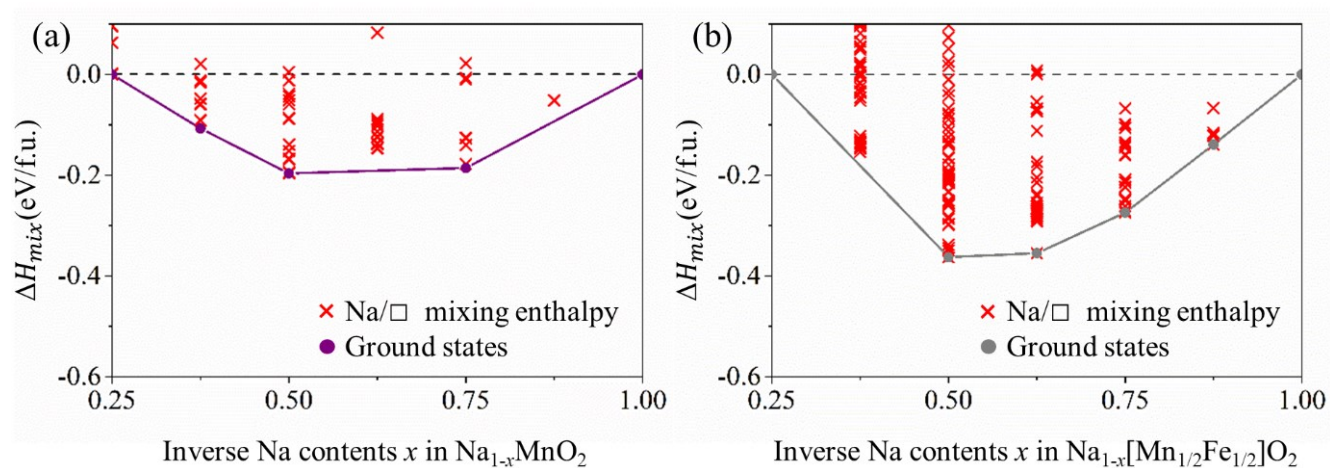

**Figure S2.** Convex hull diagram for (a)  $\text{Na}_{1-x}\text{MnO}_2$  and (b)  $\text{Na}_{1-x}[\text{Mn}_{1/2}\text{Fe}_{1/2}]\text{O}_2$  oxides. Filled circles on the tie line indicates the lowest  $\Delta H_{mix}$  at thermodynamically stable phases determined by convex hull analysis, and the rest energies were expressed as Na/□ mixing enthalpy (red-colored cross).

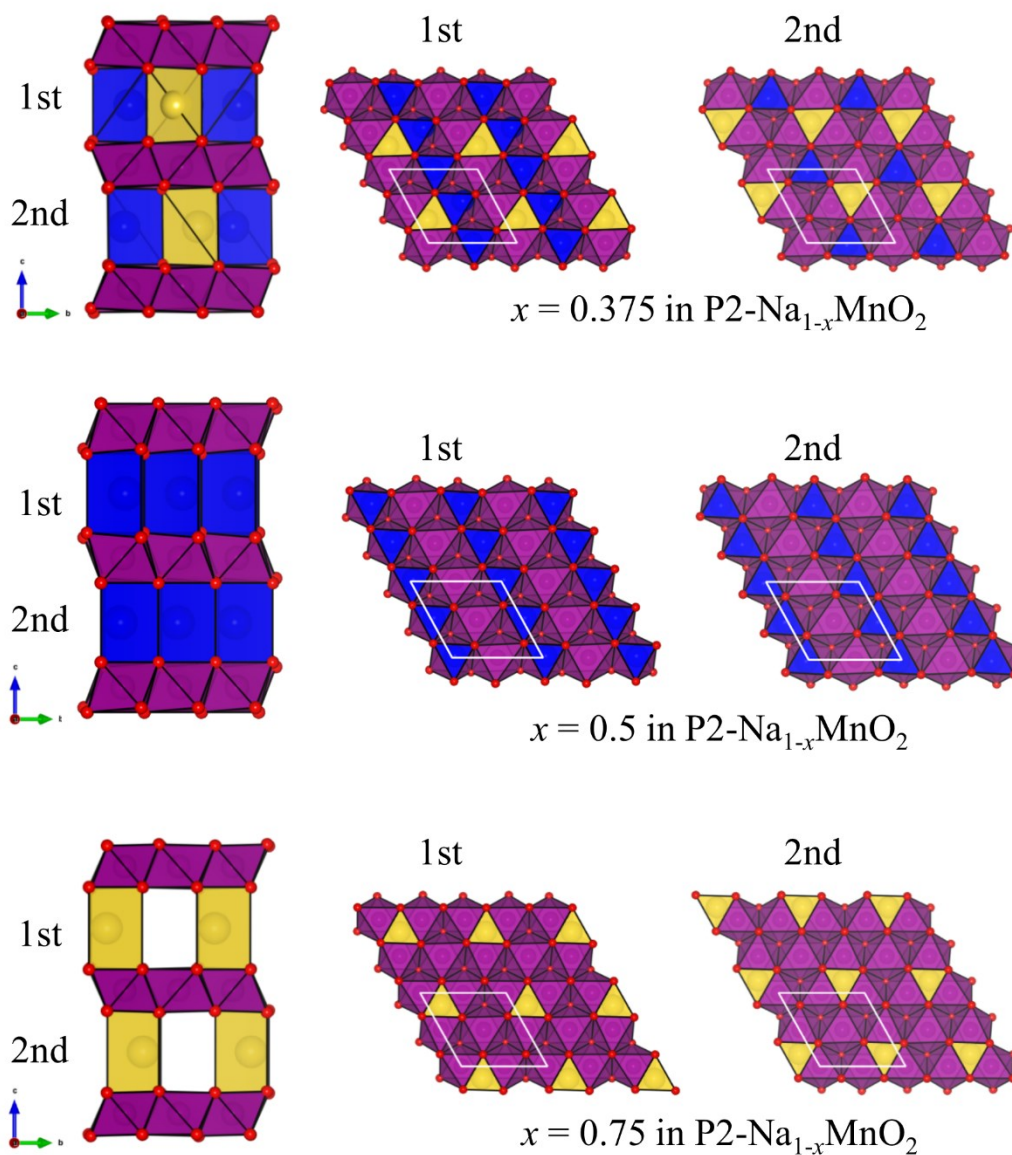

**Figure S3.** The relaxed ground state structures (left) and the arrangement of Na (right) at  $x = 0.375, 0.5$  and  $0.75$  in  $\text{Na}_{1-x}\text{MnO}_2$ . Each  $\text{Na}_e$  and  $\text{Na}_r$  prismatic site is displayed in yellow and blue.

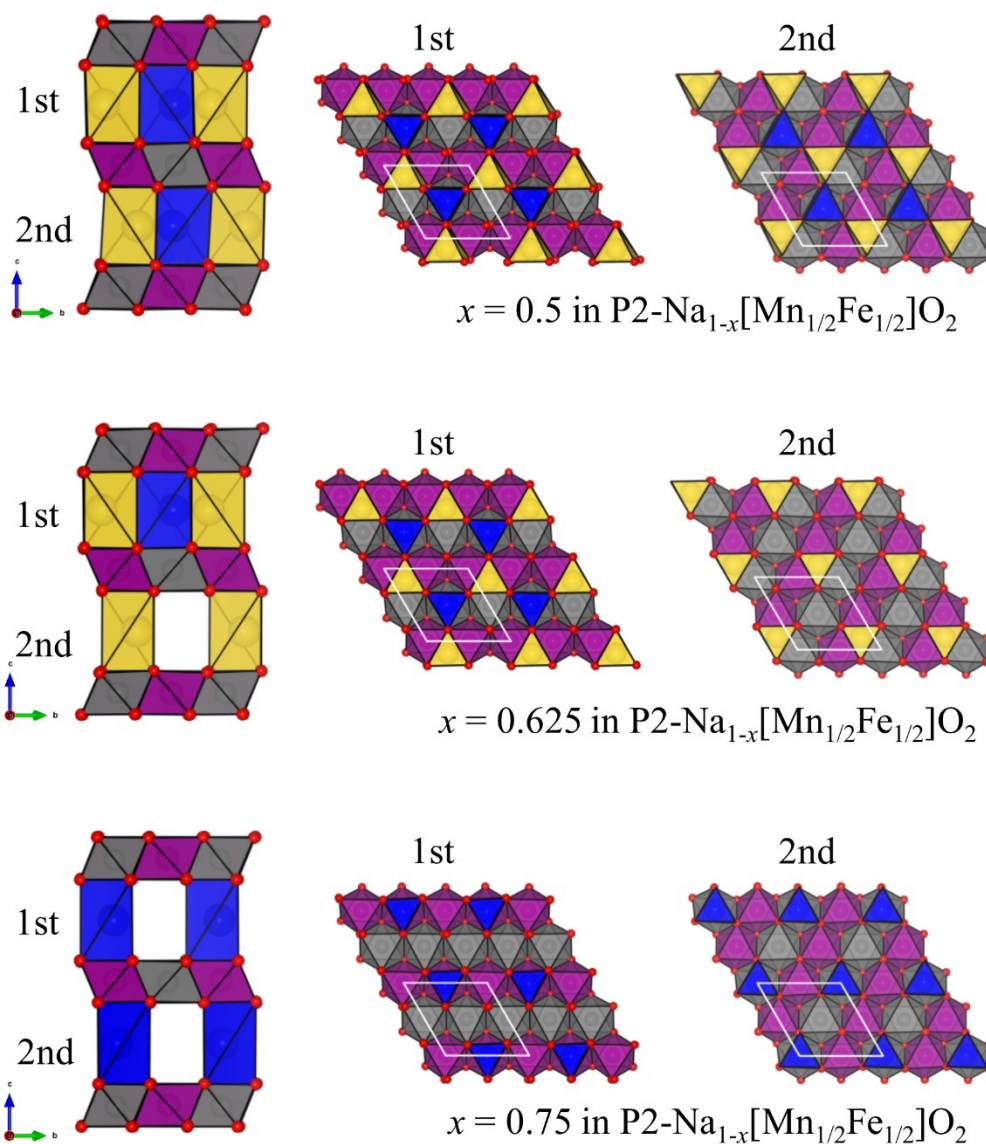

**Figure S4.** The relaxed ground state structures (left) and the arrangement of Na (right) correspond to  $x = 0.5, 0.625$  and  $0.75$  in  $\text{Na}_{1-x}[\text{Mn}_{1/2}\text{Fe}_{1/2}]\text{O}_2$ . Each  $\text{Na}_e$  and  $\text{Na}_r$  prismatic site is displayed in yellow and blue.

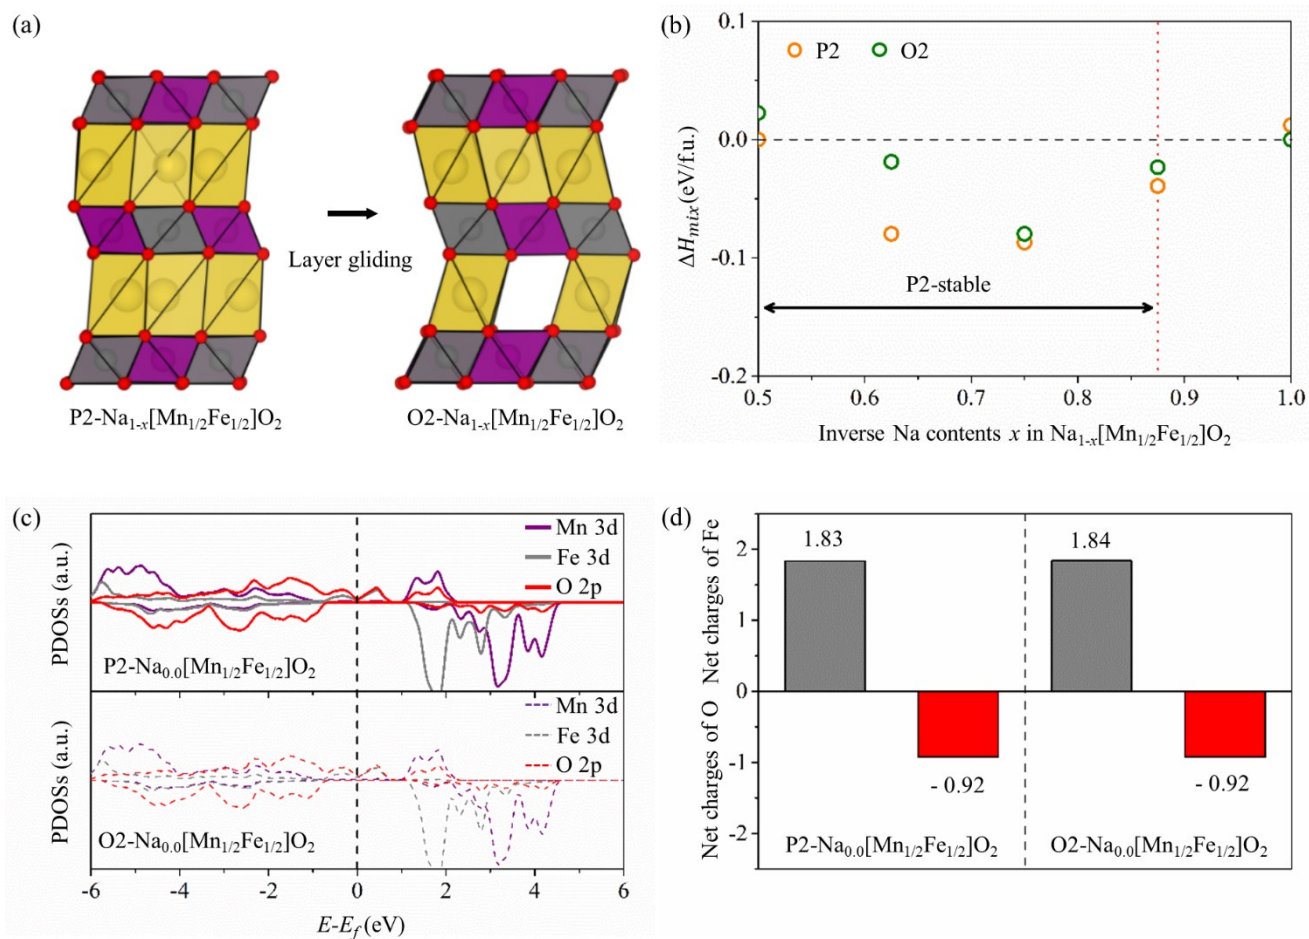

**Figure S5.** (a) The atomic structures of P2-Na<sub>1-x</sub>[Mn<sub>1/2</sub>Fe<sub>1/2</sub>]O<sub>2</sub> and O2-Na<sub>1-x</sub>[Mn<sub>1/2</sub>Fe<sub>1/2</sub>]O<sub>2</sub> (x = 0.5). The letters P and O stand for prismatic and octahedral sites, in which sodium ions can accommodate. The atomic models of O2-Na<sub>1-x</sub>[Mn<sub>1/2</sub>Fe<sub>1/2</sub>]O<sub>2</sub> (x = 0.5, 0.625, 0.75, 0.875 and 1.0) were obtained, considering that P2-O2 stacking transition results from slabs (slabs in dashed box) glided by (1/3, 2/3, 0) direction in P2-structures.<sup>1</sup> (b) Phase stability of P2-Na<sub>1-x</sub>[Mn<sub>1/2</sub>Fe<sub>1/2</sub>]O<sub>2</sub> against O2-Na<sub>1-x</sub>[Mn<sub>1/2</sub>Fe<sub>1/2</sub>]O<sub>2</sub> as a function of the inverse Na contents (x) in Na<sub>1-x</sub>[Mn<sub>1/2</sub>Fe<sub>1/2</sub>]O<sub>2</sub>. It has been observed that P2-O2 stacking transition were generally occurred at high voltage in various types of sodium layered oxide cathodes,<sup>2</sup> therefore we calculated formation energies of mixing enthalpy ( $\Delta H_{mix}$ ) for P2- and O2-Na<sub>1-x</sub>[Mn<sub>1/2</sub>Fe<sub>1/2</sub>]O<sub>2</sub>, restricting to the high voltage range (0.5 ≤ x ≤ 1.0). On the basis of obtained phase stability diagram, P2-Na<sub>1-x</sub>[Mn<sub>1/2</sub>Fe<sub>1/2</sub>]O<sub>2</sub> are more stable than O2-Na<sub>1-x</sub>[Mn<sub>1/2</sub>Fe<sub>1/2</sub>]O<sub>2</sub> within the range (0.5 ≤ x ≤ 0.875). In order to explore the possibility whether the stacking transition affect the redox mechanism, PDOSs of Mn and Fe 3d-electron and O 2p-electron at x = 1.0 in P2-Na<sub>1-x</sub>[Mn<sub>1/2</sub>Fe<sub>1/2</sub>]O<sub>2</sub> (solid line) and O2-Na<sub>1-x</sub>[Mn<sub>1/2</sub>Fe<sub>1/2</sub>]O<sub>2</sub> (dashed line) were comparatively scrutinized (Figure S5c). PDOSs are plotted with varying energy referenced to the fermi level ( $E_f$ ) for each compound. The electronic structures for P2-Na<sub>0.0</sub>[Mn<sub>1/2</sub>Fe<sub>1/2</sub>]O<sub>2</sub> and O2-Na<sub>0.0</sub>[Mn<sub>1/2</sub>Fe<sub>1/2</sub>]O<sub>2</sub> are almost identical, indicating that the P2-O2 stacking transition would not affect the redox mechanism of NMFO at high voltage. The calculated average net charges of Fe (gray bar graphs) and O (red bar graphs) in P2-Na<sub>1-x</sub>[Mn<sub>1/2</sub>Fe<sub>1/2</sub>]O<sub>2</sub> and O2-Na<sub>1-x</sub>[Mn<sub>1/2</sub>Fe<sub>1/2</sub>]O<sub>2</sub> at x = 1.0 are almost same, which is well consist with the previous electron structure results (Figure S5d).

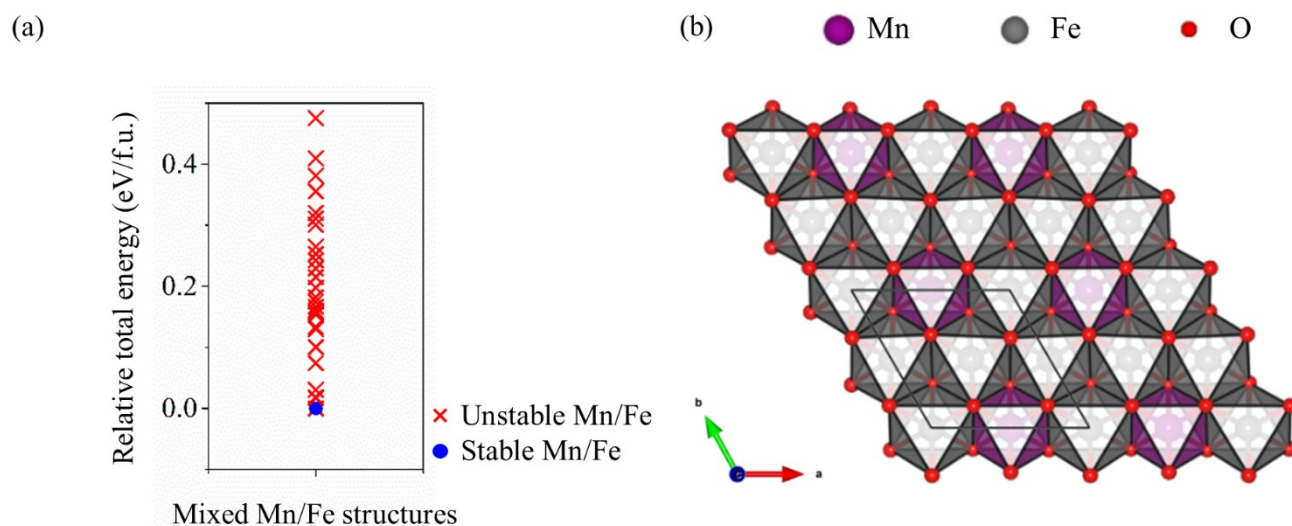

**Figure S6.** (a) Relative total energies of 30 Mn/Fe mixed structures having the lowest electrostatic energy among all possible Na/vacancy ( $x = 0.25$ ) and Mn/Fe ( $y = 0.625$ ) mixed cases in  $\text{Na}_{1-x}[\text{Mn}_{1-y}\text{Fe}_y]\text{O}_2$  (containing 8 f.u.). The lowest total energy (blue filled circle) indicates the atomic configuration at the ground state among the mixed structures and (b) the corresponding  $[\text{Mn}_{0.625}\text{Fe}_{0.375}]\text{O}_2$  slab in  $\text{Na}_{0.75}[\text{Mn}_{0.625}\text{Fe}_{0.375}]\text{O}_2$ . The honeycomb-like arrangement of Mn and Fe resemble the Mn/Fe orderings determined from the previous theoretical literature.<sup>3</sup>

|                                                                                                                 | <i>a</i> lattice parameter (Å) | <i>b</i> lattice parameter (Å) | <i>c</i> lattice parameter (Å) |
|-----------------------------------------------------------------------------------------------------------------|--------------------------------|--------------------------------|--------------------------------|
| Calculated values<br>( $x = 0.375$ in $\text{Na}_{1-x}[\text{Mn}_{1/2}\text{Fe}_{1/2}]\text{O}_2$ )             | 3.004                          | 2.98                           | 11.383                         |
| Experimentally measured values<br>( $x = 0.33$ in $\text{Na}_{1-x}[\text{Mn}_{1/2}\text{Fe}_{1/2}]\text{O}_2$ ) | 2.934                          | -                              | 11.224                         |

**Table S1.** Calculated lattice parameters of  $\text{Na}_{0.625}[\text{Mn}_{1/2}\text{Fe}_{1/2}]\text{O}_2$  ( $x = 0.375$  in  $\text{Na}_{1-x}[\text{Mn}_{1/2}\text{Fe}_{1/2}]\text{O}_2$ ) and experimentally measured lattice parameters of  $\text{P2-Na}_{2/3}[\text{Mn}_{1/2}\text{Fe}_{1/2}]\text{O}_2$  <sup>4</sup> in a unit cell size.

## References

- 1 F. Tournadre, L. Croguennec, I. Saadoune, D. Carlier, Y. Shao-Horn, P. Willmann and C. Delmas, *J. Solid State Chem.*, 2004, **177**, 2790–2802.
- 2 P. F. Wang, Y. You, Y. X. Yin and Y. G. Guo, *Adv. Energy Mater.*, 2018, **8**, 1701912.
- 3 N. A. Katcho, J. Carrasco, D. Saurel, E. Gonzalo, M. Han, F. Aguesse and T. Rojo, *Adv. Energy Mater.*, 2017, **7**, 1601477.
- 4 N. Yabuuchi, M. Kajiyama, J. Iwatate, H. Nishikawa, S. Hitomi, R. Okuyama, R. Usui, Y. Yamada and S. Komaba, *Nat. Mater.*, 2012, **11**, 512–517.
